# Supplementary material for: Remediation of Polycyclic Aromatic Hydrocarbon (Pah) and Total Petroleum Hydrocarbon (Tph) With Megathyrsus Maximus: A Field Study
Source: Research Square preprint supplement (doi:10.21203/rs.3.rs-7073846/v1), 2025-08-19
Supplement: Supplementary file 1 [file 09fc44620d9132278f219bf9.docx]

**CONSENT TO PUBLISH DECLARATION**

**The author confirms that:**

1. **The work described has not been published before.**
2. **The work is not under consideration for publication elsewhere.**
3. **Its publication has been approved by all co-authors**
4. **The copyright for publication is transferred is the manuscript is accepted for publication.**
