# Supplementary material for: Remediation of Polycyclic Aromatic Hydrocarbon (Pah) and Total Petroleum Hydrocarbon (Tph) With Megathyrsus Maximus: A Field Study
Source: Research Square preprint supplement (doi:10.21203/rs.3.rs-7073846/v1), 2025-08-19
Supplement: Supplementary file 2 [file 4a74ca5222e4c5c640d9dfec.docx]

**FUNDING DECLARATION IN THE MANUSCRIPT.**

| **The authors did not receive support from any organization for the submitted work.** |
| --- |
| **No funding was received to assist with the preparation of this manuscript** |
