# Supplementary material for: Remediation of Polycyclic Aromatic Hydrocarbon (Pah) and Total Petroleum Hydrocarbon (Tph) With Megathyrsus Maximus: A Field Study
Source: Research Square preprint supplement (doi:10.21203/rs.3.rs-7073846/v1), 2025-08-19
Supplement: Supplementary file 3 [file a8426d2fb209af5d52159d4a.docx]

**CLINICAL TRIAL NUMBER IN THE MANUSCRIPT.**

**I hereby declare that Clinical trial are not applicable in the manuscrpit**
