# Supplementary material for: Remediation of Polycyclic Aromatic Hydrocarbon (Pah) and Total Petroleum Hydrocarbon (Tph) With Megathyrsus Maximus: A Field Study
Source: Research Square preprint supplement (doi:10.21203/rs.3.rs-7073846/v1), 2025-08-19
Supplement: Supplementary file 4 [file f2afbaf991c503b5725c8c13.docx]

**CONSENT TO PARTICIPATE DECLARATION.**

**I hereby given Consent to Participate declaration with respect to the said manuscript.**
